# Supplementary material for: Identification and Pharmacological Characterization of a Low-Liability Antinociceptive Bifunctional MOR/DOR Cyclic Peptide
Source: MDPI journal article supplement (doi:10.3390/molecules28227548), 2023-11-11
Supplement: s1 [file s1]

# Supplementary Materials

## Identification and Pharmacological Characterization of a Low-Liability Antinociceptive Bifunctional MOR/DOR Cyclic Peptide

Yangmei Li <sup>1,\*</sup>, Shainnel O. Eans <sup>2</sup>, Michelle Ganno-Sherwood <sup>3</sup>, Abbe Eliasof <sup>1</sup>, Richard A. Houghten <sup>3</sup> and Jay P. McLaughlin <sup>2,\*</sup>

### Table of Contents

1. NMR data
2. Eurofins DiscoverX SAFETYscan E/IC50 ELECT-78 assays

# 1. NMR data

**Tyr-[D-Lys-Dap(Ant)-Thr-Gly] (CycloAnt).** The cyclic peptide was obtained as a TFA salt after HPLC purification.

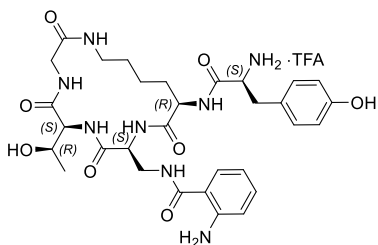

<sup>1</sup>H NMR (400 MHz, DMSO-*d*<sub>6</sub>)  $\delta$  0.99-1.22 (m, 2H), 1.03 (d, 3H, *J* = 6 Hz), 1.08-1.18 (m, 1H), 1.29-1.39 (m, 3H), 1.49-1.56 (m, 1H), 2.85-2.87 (m, 1H), 2.90 (m, 1H), 2.96-2.98 (m, 1H), 3.08-3.12 (m, 1H), 3.50 (td, 1H, *J* = 14, 6 Hz), 3.88 (d, 1H, *J* = 6.8 Hz), 3.90-3.94 (m, 1H), 3.99-4.02 (m, 2H), 4.08 (t, 1H, *J* = 6 Hz), 4.2-4.24 (m, 1H), 5.07 (d, 1H, *J* = 4.8 Hz), 6.34 (br.s, 2H), 6.49-6.52 (dd, 1H, *J* = 7.2, 1 Hz), 6.54 (d, 1H, *J* = 2 Hz), 6.72 (d, 3H, *J* = 8 Hz), 7.03 (d, 2 H, *J* = 8 Hz), 7.16 (td, 1H, *J* = 7.6, 1.6 Hz), 7.33 (t, 1H, *J* = 5.2 Hz), 7.46 (dd, 1H, *J* = 8, 1.2 Hz), 7.64 (d, 1H, *J* = 5.2 Hz), 7.72 (br.s, 1H), 8.13 (br.s, 2H), 8.29 (t, 1H, *J* = 5.6 Hz), 8.38 (t, 1H, *J* = 5.6 Hz), 8.43 (d, 1H, *J* = 7.2 Hz), 8.47 (d, 1H, *J* = 6.4 Hz), 9.39 (s, 1H)

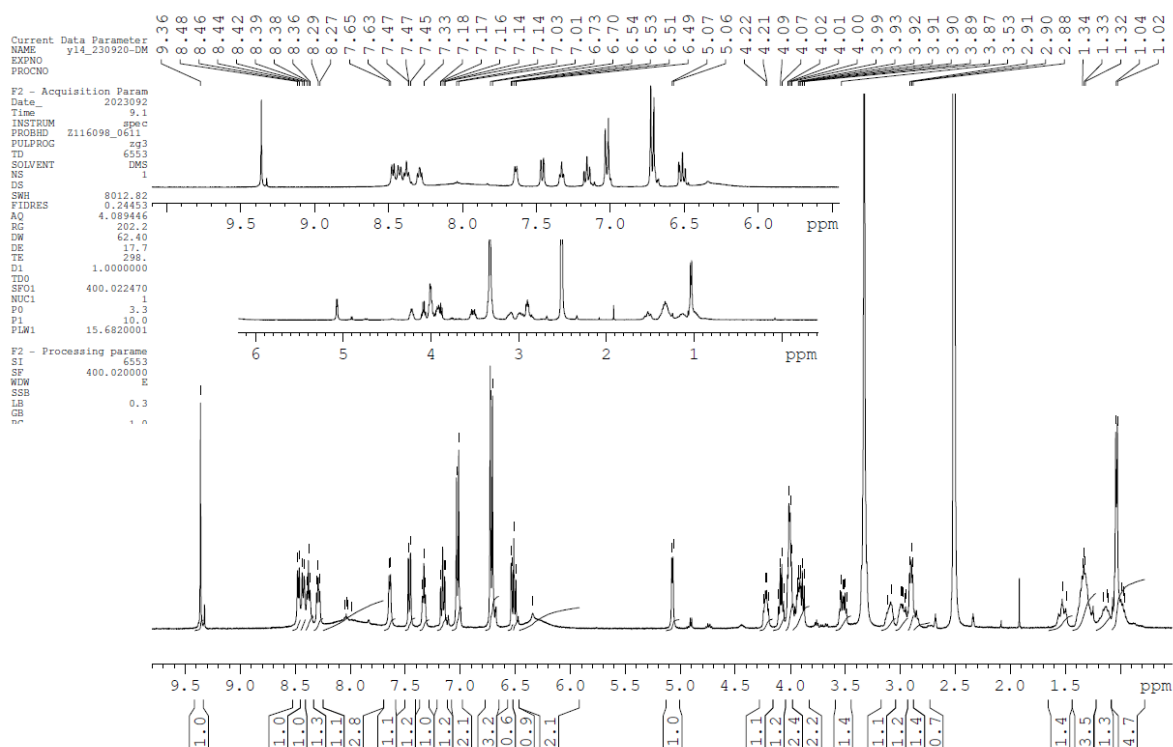

$^{13}\text{C}$  NMR (100 MHz, DMSO- $d_6$ )  $\delta$  20.1, 21.2, 28.1, 31.5, 36.8, 38.2, 40.7, 43.8, 53.6, 54.2, 56.4, 60.2, 66.3, 114.9, 115.3, 115.7, 116.9, 118.7, 125.2, 128.8, 130.9, 132.5, 149.7, 157.1, 158.4, 158.7, 168.2, 169.2, 170.5, 170.6, 172.1

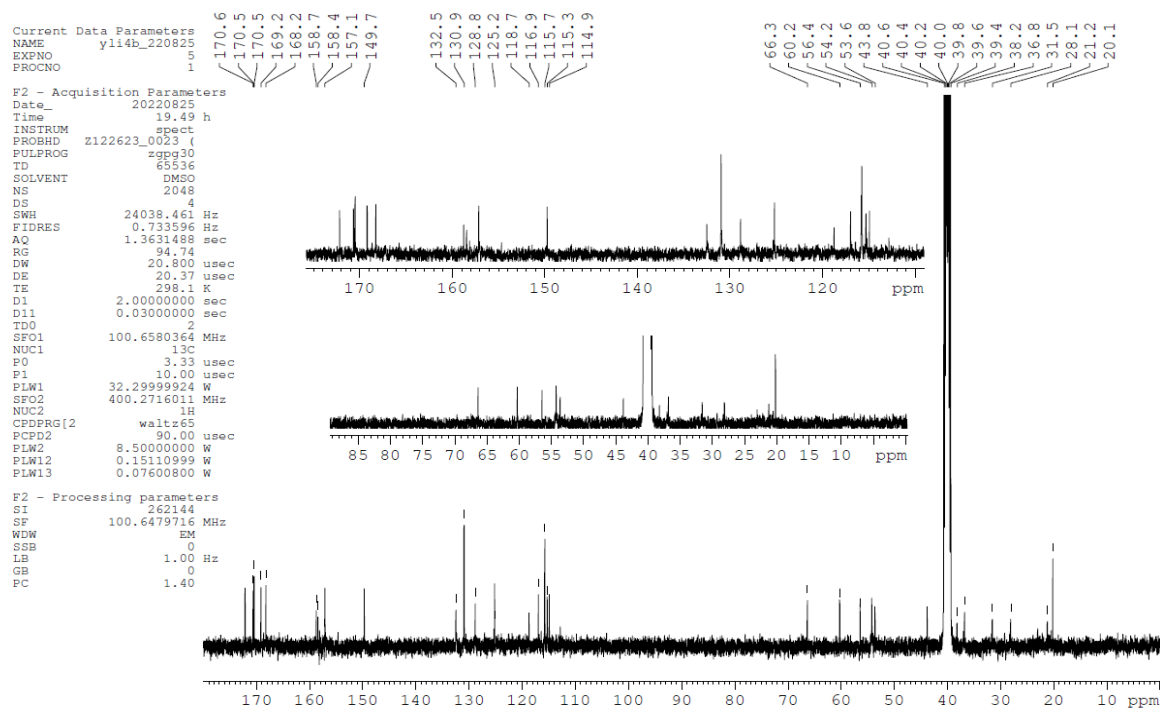

DEPT135

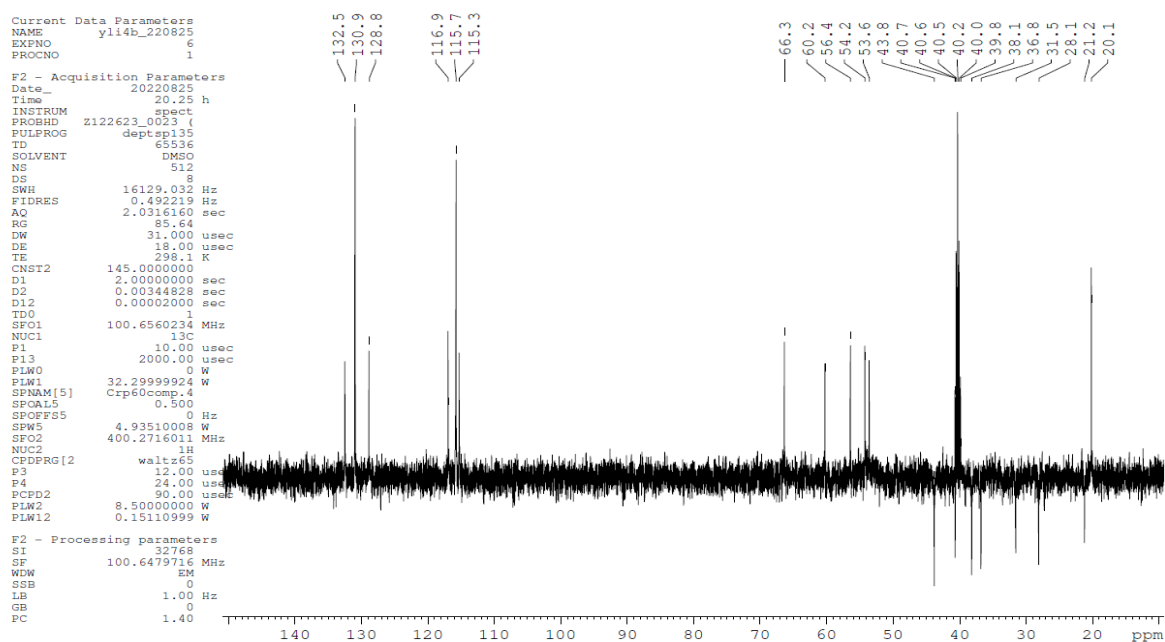

F NMR: (376 MHz): d -73.7 (s)

```

Current Data Parameters
NAME      y14_230920-DMSO-VI
EXPNO     21
PROCNO    1

F2 - Acquisition Parameters
Date_     20230920
Time      10.49 h
INSTRUM   spect
PROBHD    Z116098_0611 (
PULPROG   zgpg30
TD         131072
SOLVENT   DMSO
NS         16
DS         4
SWH        89285.711 Hz
FIDRES     1.362392 Hz
AQ         0.7340032 sec
RG         202.22
DW         5.600 usec
DE         6.50 usec
TE         330.1 K
D1         1.00000000 sec
D11        0.03000000 sec
TD0        1
SFO1       376.3572235 MHz
NUC1       19F
P0         6.00 usec
P1         18.00 usec
PLW1       18.17900085 W
SFO2       400.0216001 MHz
NUC2       1H
CPDPRG2    waltz16
PCPD2      90.00 usec
PLW2       15.68200016 W
PLW12      0.19360000 W
PLW13      0.09738200 W

F2 - Processing parameters
SI         65536
SF         376.3948628 MHz
WDW        EM
SSB        0
LB         0.30 Hz
GB         0
PC         1.00

```

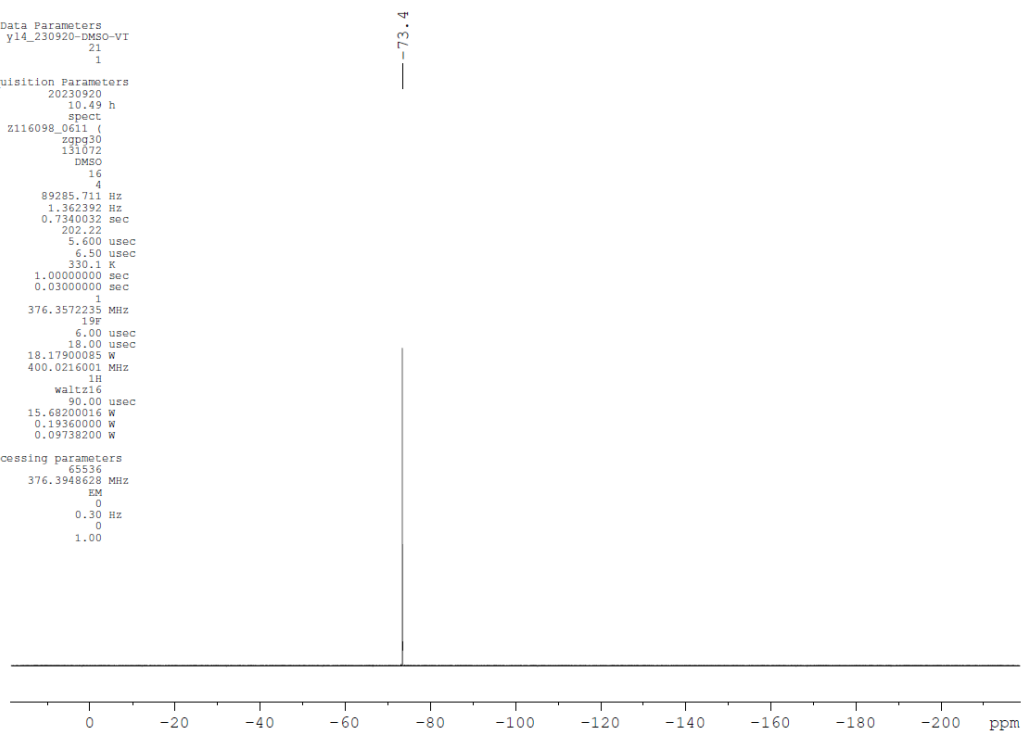

# TOCSY

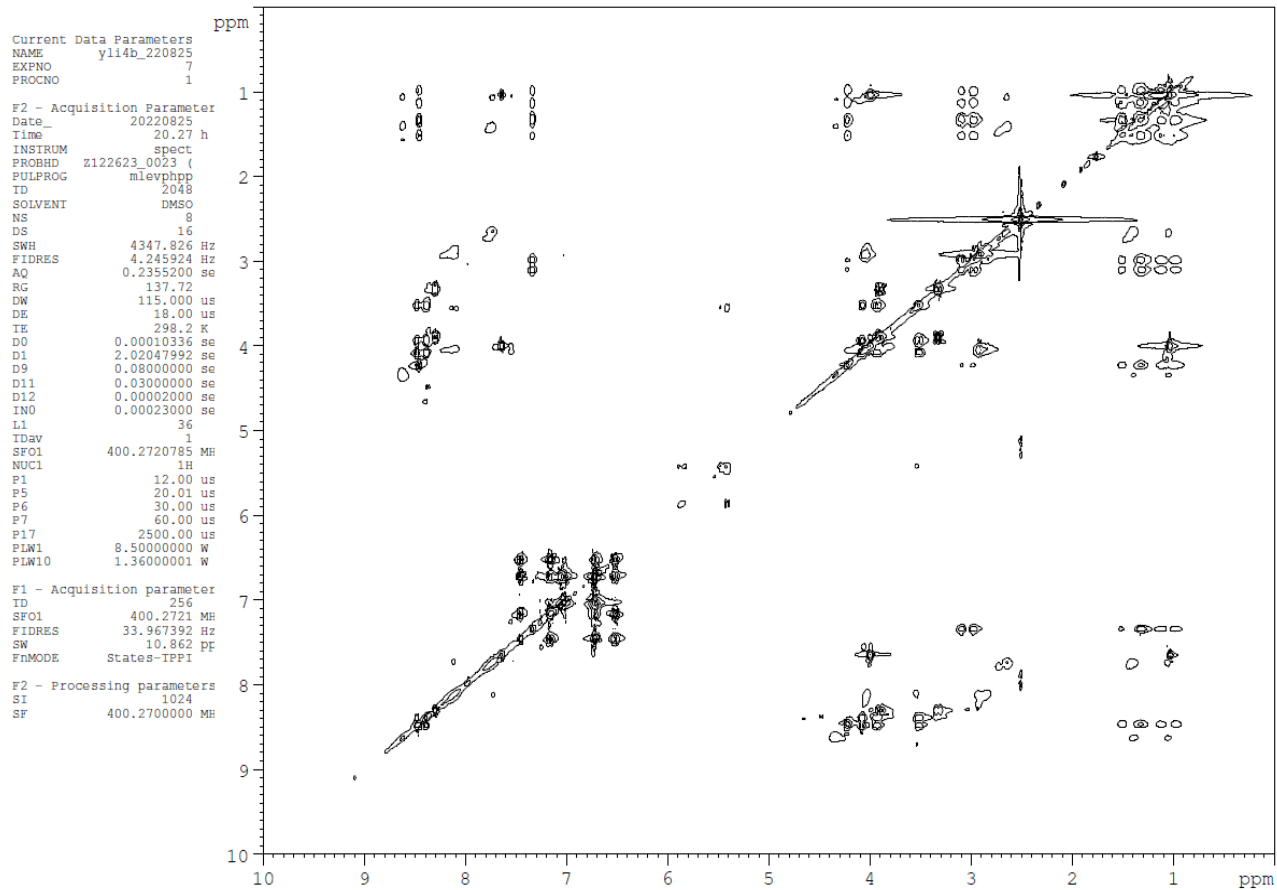

**Leu-[D-Lys-Dap(Ant)-Thr-Gly] (CycloAnt-Leu).** The cyclic peptide was obtained as a TFA salt after HPLC purification.

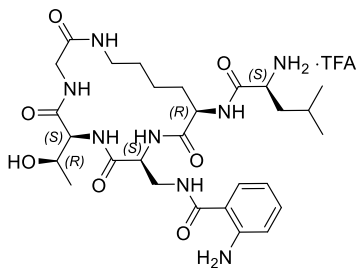

$^1\text{H}$  NMR (400 MHz,  $\text{DMSO}-d_6$ )  $\delta$  8.83 (d, 1H,  $J = 7.2$ ), 8.57 (d, 1H,  $J = 6.0$  Hz), 8.38 (t, 1H,  $J = 6.0$  Hz), 8.26 (t, 1H,  $J = 6.0$  Hz), 8.15 (s, 3H), 7.66 (d, 1H,  $J = 6.0$  Hz), 7.48 (dd, 1H,  $J = 8.28$  Hz, 1.2 Hz), 7.41 (t, 1H,  $J = 5.6$  Hz), 7.16 (td, 1H,  $J = 7.68$  Hz, 1.2 Hz), 6.73 (dd, 1H,  $J = 8.2$  Hz, 0.68 Hz), 6.51 (t, 1H,  $J = 7.6$  Hz), 4.19 (q, 1H,  $J =$ ), 4.12 (q, 1H,  $J = 6.0$  Hz), 4.03 (d, 1H,  $J = 5.96$  Hz), 4.03 (m, 1H), 3.98 (m, 1H), 3.91 (m, 1H), 3.88 (dd, 1H,  $J = 16.4$  Hz, 6.8 Hz), 3.53 (dt, 1H,  $J = 14.0$  Hz, 5.6 Hz), 3.36 (dd, 1H,  $J = 16.0$  Hz, 4.8 Hz), 3.18 – 3.10 (m, 1H), 3.01 – 2.94 (m, 1H), 1.61 (m, 5H), 1.46 – 1.21 (m, 4H), 1.03 (d, 2H,  $J = 6.0$  Hz), 0.92 (d, 6H,  $J = 5.6$  Hz)

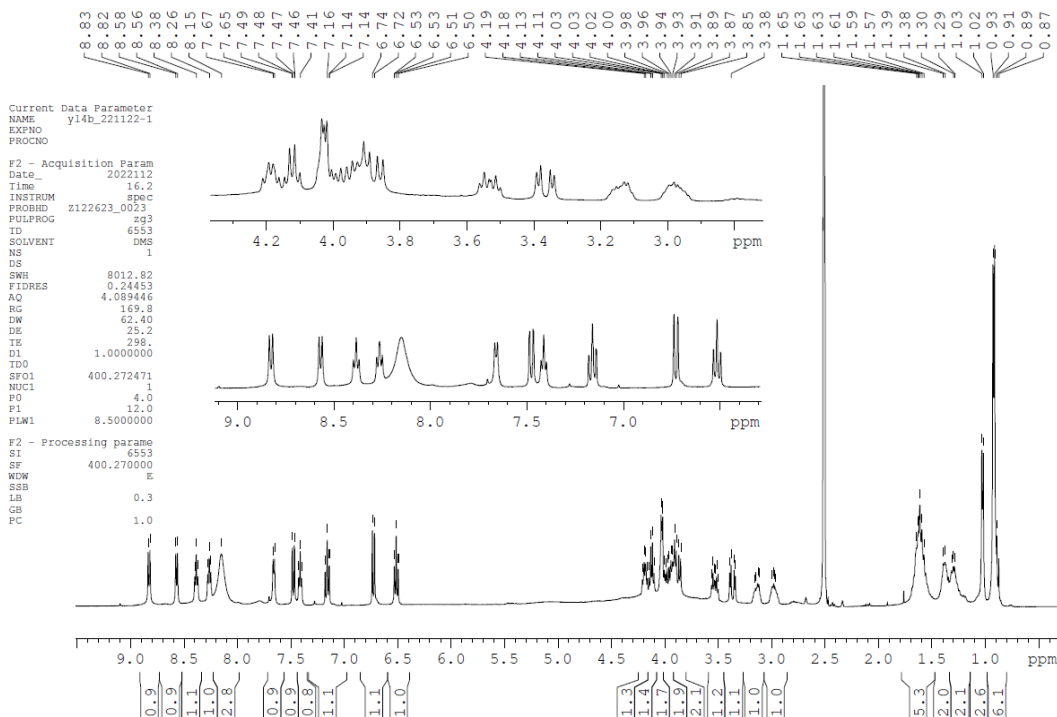

$^{13}\text{C}$  NMR (400 MHz, DMSO- $d_6$ )  $\delta$  172.36, 170.72, 170.51, 170.48, 169.53, 169.151, 158.75, 158.43, 149.83, 132.50, 128.85, 118.78, 116.94, 115.81, 115.22, 114.72, 66.32, 60.03, 56.44, 54.41, 51.39, 43.83, 40.55, 40.39, 38.17, 31.62, 28.23, 24.08, 23.22, 22.09, 21.71, 20.11

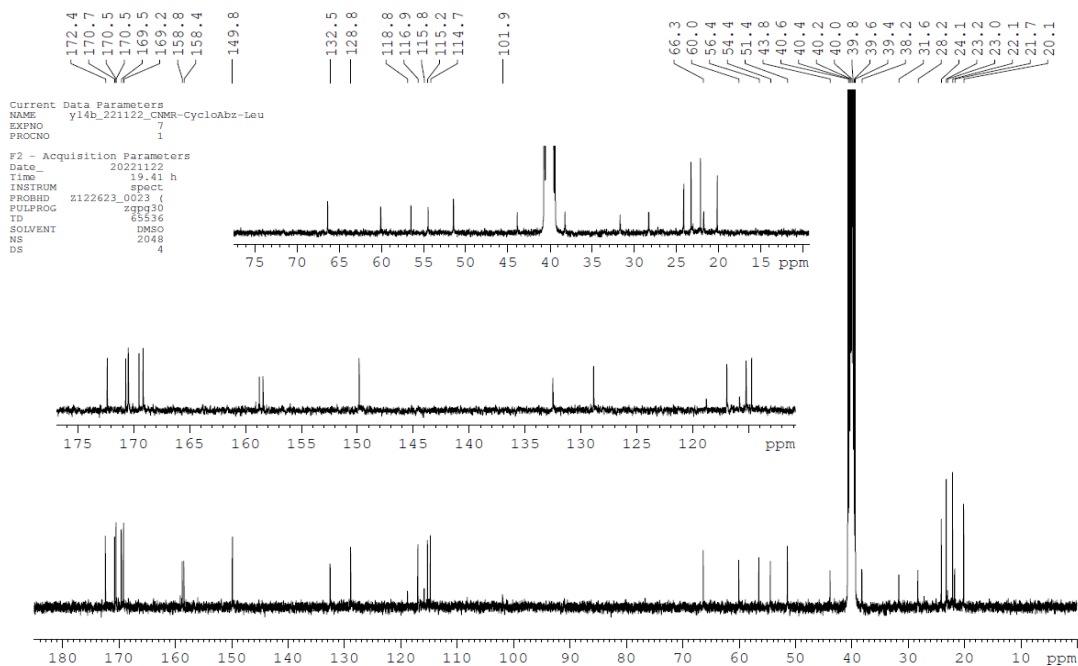

## DEPT135

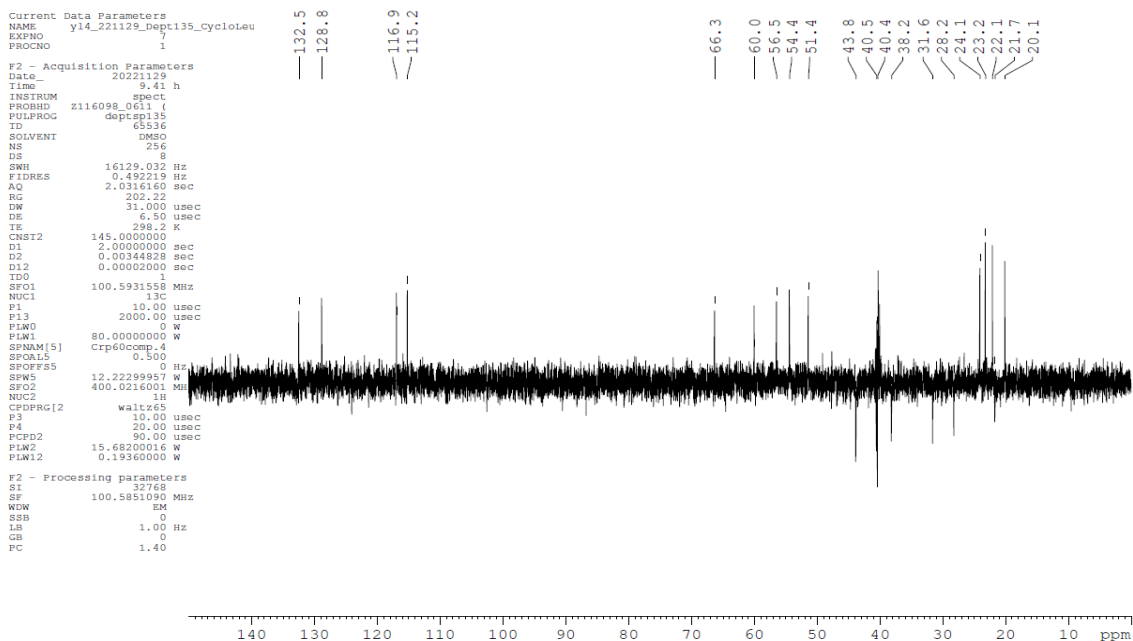

# TOCSY

Current Data Parameters  
 NAME y14b\_221122\_TOCSY-CycloAbz-Leu  
 EXPNO 6  
 PROCNO 1

F2 - Acquisition Parameters  
 Date\_ 20221122  
 Time 16:22 h  
 INSTRUM spect  
 PROBHD z122623\_0023 (  
 PULPROG mlevpph  
 TD 2048  
 SOLVENT DMSO

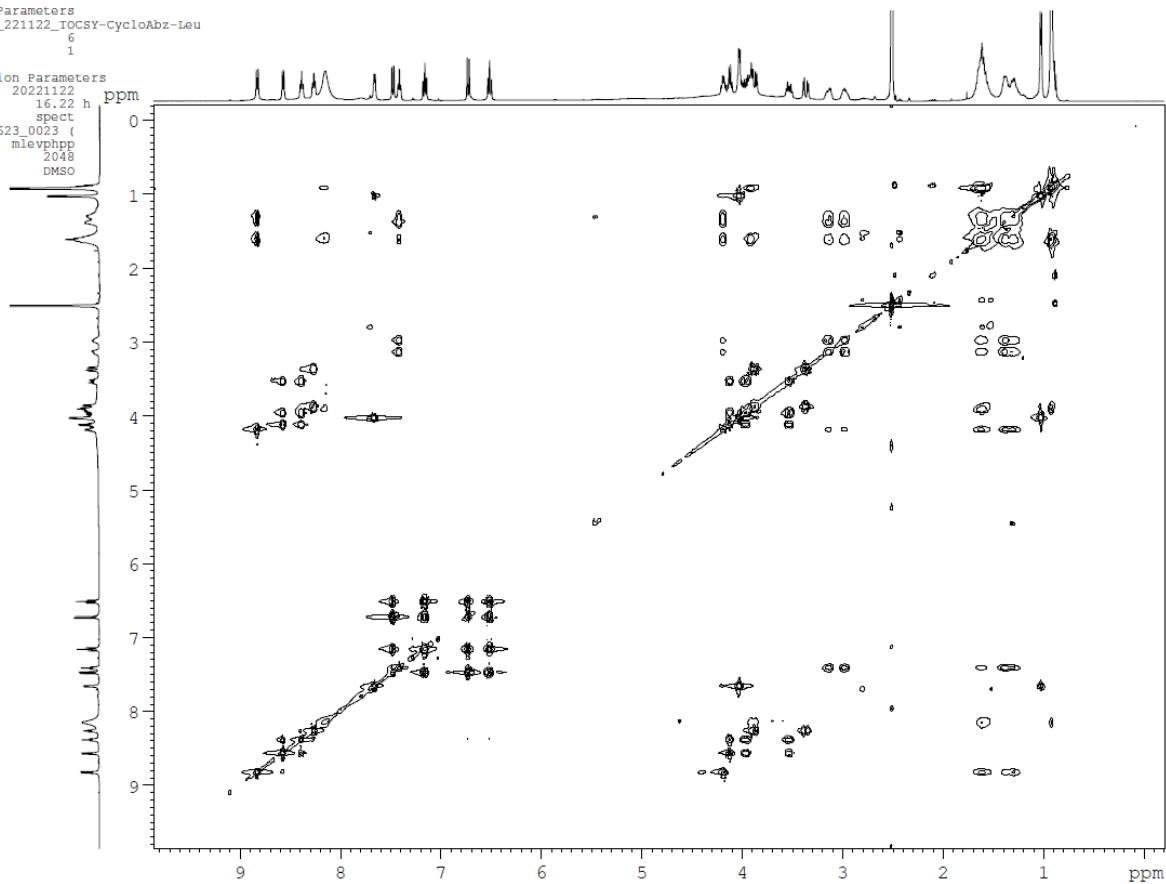



## 2. Safety47 Panel Dose Response

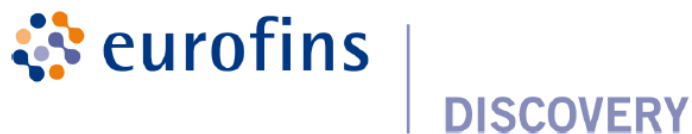

### Results: Summary Table

| Compound Name | Order ID        | Target Class | Assay Name   | Mode       | Assay Target | Result Type | Value Prefix | EC50 (µM) | Hill | Curve Bottom | Curve Top | Max Response |
|---------------|-----------------|--------------|--------------|------------|--------------|-------------|--------------|-----------|------|--------------|-----------|--------------|
| USCYL05       | US073-0023285-O | GPCR         | Calcium Flux | Agonist    | ADORA2A      | EC50        | >            | 5         |      |              |           | 0            |
| USCYL05       | US073-0023285-O | GPCR         | Calcium Flux | Agonist    | ADRA1A       | EC50        | >            | 5         |      |              |           | 2.7          |
| USCYL05       | US073-0023285-O | GPCR         | Calcium Flux | Agonist    | AVPR1A       | EC50        | >            | 5         |      |              |           | 1.19         |
| USCYL05       | US073-0023285-O | GPCR         | Calcium Flux | Agonist    | CCKAR        | EC50        | >            | 5         |      |              |           | 0            |
| USCYL05       | US073-0023285-O | GPCR         | Calcium Flux | Agonist    | CHRM1        | EC50        | >            | 5         |      |              |           | 1.1          |
| USCYL05       | US073-0023285-O | GPCR         | Calcium Flux | Agonist    | CHRM3        | EC50        | >            | 5         |      |              |           | 0            |
| USCYL05       | US073-0023285-O | GPCR         | Calcium Flux | Agonist    | EDNRA        | EC50        | >            | 5         |      |              |           | 0            |
| USCYL05       | US073-0023285-O | GPCR         | Calcium Flux | Agonist    | HRH1         | EC50        | >            | 5         |      |              |           | 1.47         |
| USCYL05       | US073-0023285-O | GPCR         | Calcium Flux | Agonist    | HTR2A        | EC50        | >            | 5         |      |              |           | 0            |
| USCYL05       | US073-0023285-O | GPCR         | Calcium Flux | Agonist    | HTR2B        | EC50        | >            | 5         |      |              |           | 0            |
| USCYL05       | US073-0023285-O | GPCR         | Calcium Flux | Antagonist | ADORA2A      | IC50        | >            | 5         |      |              |           | 10.1         |
| USCYL05       | US073-0023285-O | GPCR         | Calcium Flux | Antagonist | ADRA1A       | IC50        | >            | 5         |      |              |           | 5.86         |
| USCYL05       | US073-0023285-O | GPCR         | Calcium Flux | Antagonist | AVPR1A       | IC50        | >            | 5         |      |              |           | 0            |
| USCYL05       | US073-0023285-O | GPCR         | Calcium Flux | Antagonist | CCKAR        | IC50        | >            | 5         |      |              |           | 0            |
| USCYL05       | US073-0023285-O | GPCR         | Calcium Flux | Antagonist | CHRM1        | IC50        | >            | 5         |      |              |           | 0            |
| USCYL05       | US073-0023285-O | GPCR         | Calcium Flux | Antagonist | CHRM3        | IC50        | >            | 5         |      |              |           | 2.03         |
| USCYL05       | US073-0023285-O | GPCR         | Calcium Flux | Antagonist | EDNRA        | IC50        | >            | 5         |      |              |           | 2.26         |
| USCYL05       | US073-0023285-O | GPCR         | Calcium Flux | Antagonist | HRH1         | IC50        | >            | 5         |      |              |           | 8.01         |
| USCYL05       | US073-0023285-O | GPCR         | Calcium Flux | Antagonist | HTR2A        | IC50        | >            | 5         |      |              |           | 0            |
| USCYL05       | US073-0023285-O | GPCR         | Calcium Flux | Antagonist | HTR2B        | IC50        | >            | 5         |      |              |           | 2.57         |
| USCYL05       | US073-0023285-O | GPCR         | cAMP         | Agonist    | ADORA2A      | EC50        | >            | 5         |      |              |           | 0            |
| USCYL05       | US073-0023285-O | GPCR         | cAMP         | Agonist    | ADRB1        | EC50        | >            | 5         |      |              |           | 0            |
| USCYL05       | US073-0023285-O | GPCR         | cAMP         | Agonist    | ADRB2        | EC50        | >            | 5         |      |              |           | 0            |
| USCYL05       | US073-0023285-O | GPCR         | cAMP         | Agonist    | CHRM2        | EC50        | >            | 5         |      |              |           | 13.68        |
| USCYL05       | US073-0023285-O | GPCR         | cAMP         | Agonist    | CNR1         | EC50        | >            | 5         |      |              |           | 6.81         |
| USCYL05       | US073-0023285-O | GPCR         | cAMP         | Agonist    | CNR2         | EC50        | >            | 5         |      |              |           | 10.78        |

## Results: Summary Table (cont.)

| Compound Name | Order ID        | Target Class | Assay Name  | Mode       | Assay Target | Result Type | Value Prefix | RC50 (µM) | Hill | Curve Bottom | Curve Top | Max Response |
|---------------|-----------------|--------------|-------------|------------|--------------|-------------|--------------|-----------|------|--------------|-----------|--------------|
| USCYL05       | US073-0023285-O | GPCR         | cAMP        | Agonist    | DRD1         | EC50        | >            | 5         |      |              |           | 0.11         |
| USCYL05       | US073-0023285-O | GPCR         | cAMP        | Agonist    | DRD2S        | EC50        | >            | 5         |      |              |           | 0            |
| USCYL05       | US073-0023285-O | GPCR         | cAMP        | Agonist    | HRH2         | EC50        | >            | 5         |      |              |           | 0            |
| USCYL05       | US073-0023285-O | GPCR         | cAMP        | Agonist    | HTR1A        | EC50        | >            | 5         |      |              |           | 1.37         |
| USCYL05       | US073-0023285-O | GPCR         | cAMP        | Agonist    | HTR1B        | EC50        | >            | 5         |      |              |           | 6.52         |
| USCYL05       | US073-0023285-O | GPCR         | cAMP        | Agonist    | OPRD1        | EC50        | =            | 0.00336   | 1.21 | 0            | 100       | 100.82       |
| USCYL05       | US073-0023285-O | GPCR         | cAMP        | Agonist    | OPRK1        | EC50        | >            | 5         |      |              |           | 0.78         |
| USCYL05       | US073-0023285-O | GPCR         | cAMP        | Agonist    | OPRM1        | EC50        | =            | 0.01404   | 1.48 | 0            | 100       | 98.78        |
| USCYL05       | US073-0023285-O | GPCR         | cAMP        | Antagonist | ADRA2A       | IC50        | >            | 5         |      |              |           | 2.69         |
| USCYL05       | US073-0023285-O | GPCR         | cAMP        | Antagonist | ADRB1        | IC50        | >            | 5         |      |              |           | 0            |
| USCYL05       | US073-0023285-O | GPCR         | cAMP        | Antagonist | ADRB2        | IC50        | >            | 5         |      |              |           | 0            |
| USCYL05       | US073-0023285-O | GPCR         | cAMP        | Antagonist | CHRM2        | IC50        | >            | 5         |      |              |           | 6.71         |
| USCYL05       | US073-0023285-O | GPCR         | cAMP        | Antagonist | CNR1         | IC50        | >            | 5         |      |              |           | 6.13         |
| USCYL05       | US073-0023285-O | GPCR         | cAMP        | Antagonist | CNR2         | IC50        | >            | 5         |      |              |           | 0            |
| USCYL05       | US073-0023285-O | GPCR         | cAMP        | Antagonist | DRD1         | IC50        | >            | 5         |      |              |           | 0            |
| USCYL05       | US073-0023285-O | GPCR         | cAMP        | Antagonist | DRD2S        | IC50        | >            | 5         |      |              |           | 2.83         |
| USCYL05       | US073-0023285-O | GPCR         | cAMP        | Antagonist | HRH2         | IC50        | >            | 5         |      |              |           | 0            |
| USCYL05       | US073-0023285-O | GPCR         | cAMP        | Antagonist | HTR1A        | IC50        | >            | 5         |      |              |           | 4.16         |
| USCYL05       | US073-0023285-O | GPCR         | cAMP        | Antagonist | HTR1B        | IC50        | >            | 5         |      |              |           | 0.52         |
| USCYL05       | US073-0023285-O | GPCR         | cAMP        | Antagonist | OPRD1        | IC50        | >            | 5         |      |              |           | 0            |
| USCYL05       | US073-0023285-O | GPCR         | cAMP        | Antagonist | OPRK1        | IC50        | >            | 5         |      |              |           | 1.38         |
| USCYL05       | US073-0023285-O | GPCR         | cAMP        | Antagonist | OPRM1        | IC50        | >            | 5         |      |              |           | 0            |
| USCYL05       | US073-0023285-O | Ion Channel  | Ion Channel | Blocker    | CAV1.2       | IC50        | >            | 5         |      |              |           | 18.67        |
| USCYL05       | US073-0023285-O | Ion Channel  | Ion Channel | Blocker    | GABAA        | IC50        | >            | 5         |      |              |           | 25.09        |
| USCYL05       | US073-0023285-O | Ion Channel  | Ion Channel | Blocker    | hERG         | IC50        | >            | 5         |      |              |           | 4.3          |
| USCYL05       | US073-0023285-O | Ion Channel  | Ion Channel | Blocker    | HTR3A        | IC50        | >            | 5         |      |              |           | 18.94        |

## Results: Summary Table (cont.)

| Compound Name | Order ID        | Target Class       | Assay Name                | Mode       | Assay Target  | Result Type | Value Prefix | EC50 (μM) | Hill | Curve Bottom | Curve Top | Max Response |
|---------------|-----------------|--------------------|---------------------------|------------|---------------|-------------|--------------|-----------|------|--------------|-----------|--------------|
| USCYL05       | US073-0023285-O | Ion Channel        | Ion Channel               | Blocker    | KvLQT1/minK   | IC50        | >            | 5         |      |              |           | 7.33         |
| USCYL05       | US073-0023285-O | Ion Channel        | Ion Channel               | Blocker    | nAChR(α4/β2)  | IC50        | >            | 5         |      |              |           | 0            |
| USCYL05       | US073-0023285-O | Ion Channel        | Ion Channel               | Blocker    | NAV1.5        | IC50        | >            | 5         |      |              |           | 0            |
| USCYL05       | US073-0023285-O | Ion Channel        | Ion Channel               | Blocker    | NMDAR (1A/2B) | IC50        | >            | 5         |      |              |           | 0            |
| USCYL05       | US073-0023285-O | Ion Channel        | Ion Channel               | Opener     | GABAA         | EC50        | >            | 5         |      |              |           | 1.74         |
| USCYL05       | US073-0023285-O | Ion Channel        | Ion Channel               | Opener     | HTR3A         | EC50        | >            | 5         |      |              |           | 9.8          |
| USCYL05       | US073-0023285-O | Ion Channel        | Ion Channel               | Opener     | KvLQT1/minK   | EC50        | >            | 5         |      |              |           | 0.46         |
| USCYL05       | US073-0023285-O | Ion Channel        | Ion Channel               | Opener     | nAChR(α4/β2)  | EC50        | >            | 5         |      |              |           | 0            |
| USCYL05       | US073-0023285-O | Ion Channel        | Ion Channel               | Opener     | NMDAR (1A/2B) | EC50        | >            | 5         |      |              |           | 0            |
| USCYL05       | US073-0023285-O | Kinases            | Binding                   | Inhibitor  | INSR          | IC50        | >            | 5         |      |              |           | 0            |
| USCYL05       | US073-0023285-O | Kinases            | Binding                   | Inhibitor  | LCK           | IC50        | >            | 5         |      |              |           | 0            |
| USCYL05       | US073-0023285-O | Kinases            | Binding                   | Inhibitor  | ROCK1         | IC50        | >            | 5         |      |              |           | 7.68         |
| USCYL05       | US073-0023285-O | Kinases            | Binding                   | Inhibitor  | VEGFR2        | IC50        | >            | 5         |      |              |           | 0            |
| USCYL05       | US073-0023285-O | NHR                | NHR Nuclear Translocation | Agonist    | AR            | EC50        | >            | 5         |      |              |           | 0            |
| USCYL05       | US073-0023285-O | NHR                | NHR Nuclear Translocation | Antagonist | AR            | IC50        | >            | 5         |      |              |           | 1.11         |
| USCYL05       | US073-0023285-O | NHR                | NHR Protein Interaction   | Agonist    | GR            | EC50        | >            | 5         |      |              |           | 0            |
| USCYL05       | US073-0023285-O | NHR                | NHR Protein Interaction   | Antagonist | GR            | IC50        | >            | 5         |      |              |           | 5.74         |
| USCYL05       | US073-0023285-O | Non-Kinase Enzymes | Enzymatic                 | Inhibitor  | AChE          | IC50        | >            | 5         |      |              |           | 0            |
| USCYL05       | US073-0023285-O | Non-Kinase Enzymes | Enzymatic                 | Inhibitor  | COX1          | IC50        | >            | 5         |      |              |           | 0            |
| USCYL05       | US073-0023285-O | Non-Kinase Enzymes | Enzymatic                 | Inhibitor  | COX2          | IC50        | >            | 5         |      |              |           | 0            |
| USCYL05       | US073-0023285-O | Non-Kinase Enzymes | Enzymatic                 | Inhibitor  | MAOA          | IC50        | >            | 5         |      |              |           | 0            |
| USCYL05       | US073-0023285-O | Non-Kinase Enzymes | Enzymatic                 | Inhibitor  | PDE3A         | IC50        | >            | 5         |      |              |           | 0.74         |
| USCYL05       | US073-0023285-O | Non-Kinase Enzymes | Enzymatic                 | Inhibitor  | PDE4D2        | IC50        | >            | 5         |      |              |           | 0            |
| USCYL05       | US073-0023285-O | Transporter        | Transporter               | Blocker    | DAT           | IC50        | >            | 5         |      |              |           | 12.09        |
| USCYL05       | US073-0023285-O | Transporter        | Transporter               | Blocker    | NET           | IC50        | >            | 5         |      |              |           | 15.42        |
| USCYL05       | US073-0023285-O | Transporter        | Transporter               | Blocker    | SERT          | IC50        | >            | 5         |      |              |           | 3.65         |
